# Supplementary material for: SAGE: Decoupling Spatial Logic from Metric Scale for Zero-Shot Multi-Robot Exploration
Source: Research Square preprint supplement (doi:10.21203/rs.3.rs-8307666/v1), 2025-12-16
Supplement: Supplementary file 1 [file e87551837fb6a451fe2f2b71.pdf]

**Supplementary Information for:**

**SAGE: Decoupling Spatial Logic from Metric Scale for  
Zero-Shot Multi-Robot Exploration**

Xiao Cao<sup>†</sup>, Mingyang Li<sup>†</sup>, Yi Luo<sup>†</sup>, Yuting Tao, Bowen Xu, Peng Lu<sup>\*</sup>

<sup>\*</sup>Corresponding author. Email: peng.lu@hku.hk

**Supplementary Movie Caption**

**Movie S1: Demonstration of SAGE’s zero-shot transfer capabilities.**

This video demonstrates the policy’s performance across a spectrum of domains, progressing from low-fidelity training grids and large-scale generalization tests to high-fidelity simulations and real-world deployment in wild outdoor forests.
